# Supplementary material for: Synthesis of Fe0.32Co0.68/γ-Al2O3@C nanocomposite for depth treatment of dye sewage based on adsorption and advanced catalytic oxidation
Source: Royal Society of Chemistry journal article supplement (doi:10.1039/c6ta10919e), 2017-01-01
Supplement: c6ta10919e1.pdf [file c6ta10919e1.pdf]

## Supporting Information

# Synthesis of $\text{Fe}_{0.32}\text{Co}_{0.68}/\gamma\text{-Al}_2\text{O}_3@\text{C}$ nanocomposite for depth treatment of dyes sewage based on adsorption and advanced catalytic oxidation

Zepei Bao, Lin Ye, Beibei Fang, Lijun Zhao\*

Key Laboratory of Automobile Materials (Jilin University), Ministry of Education and  
School of Materials Science and Engineering, Jilin University, Changchun 130022, China.

\*Corresponding author:

E-mail: [lijunzhao@jlu.edu.cn](mailto:lijunzhao@jlu.edu.cn); Fax: +86-0431-85095876

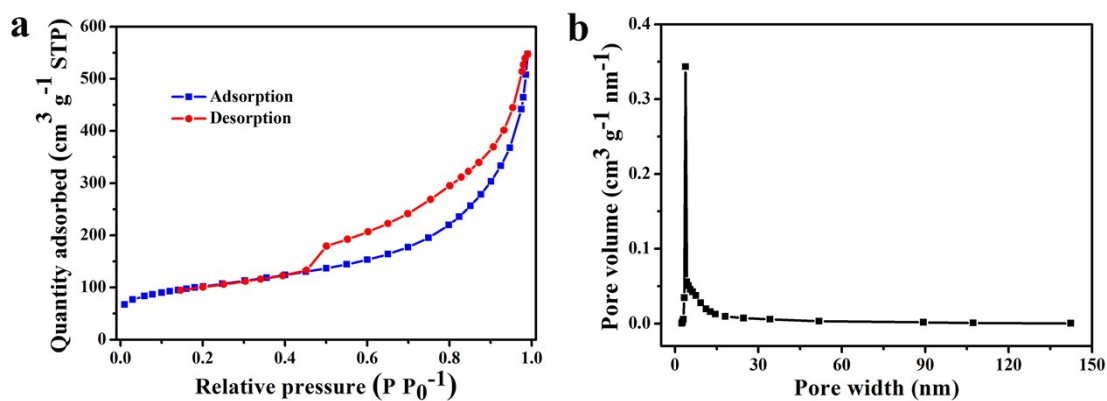

**Fig. S1** (a) N<sub>2</sub> adsorption-desorption isotherms and (b) the corresponding pore size distribution of  $\gamma\text{-Al}_2\text{O}_3@\text{C}$  calculated using the BJH method.

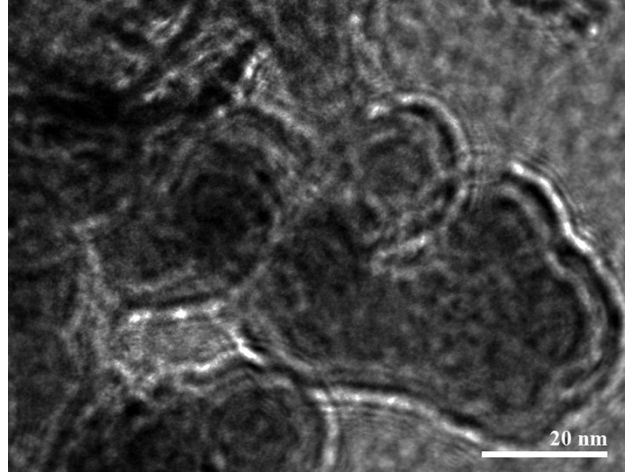

**Fig. S2** HRTEM image of the as-synthesized  $\text{Fe}_{0.32}\text{Co}_{0.68}/\gamma\text{-Al}_2\text{O}_3@\text{C}$  nanocomposite.

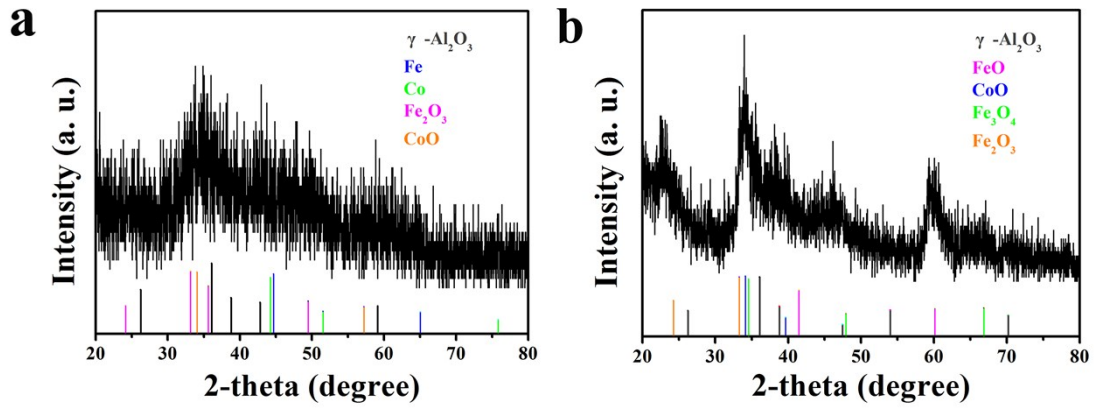

**Fig. S3** XRD patterns of: (a)  $\text{Fe}_{0.32}\text{Co}_{0.68}/\gamma\text{-Al}_2\text{O}_3@\text{C}$  composite and (b) Fe-Co oxide/ $\gamma\text{-Al}_2\text{O}_3@\text{C}$  composite.

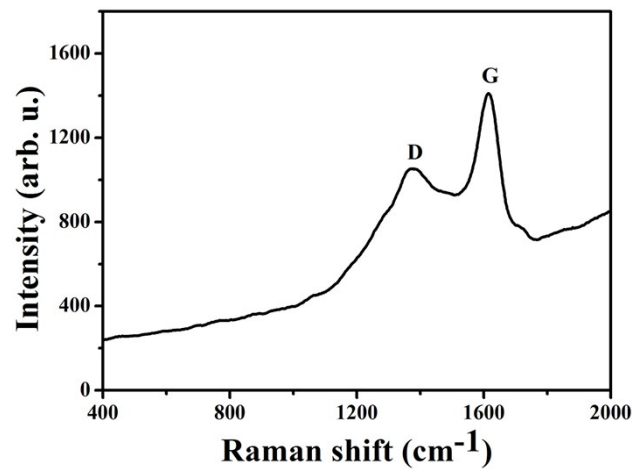

**Fig. S4** Raman spectra of the flower-like  $\gamma$ -Al<sub>2</sub>O<sub>3</sub>@C composite.

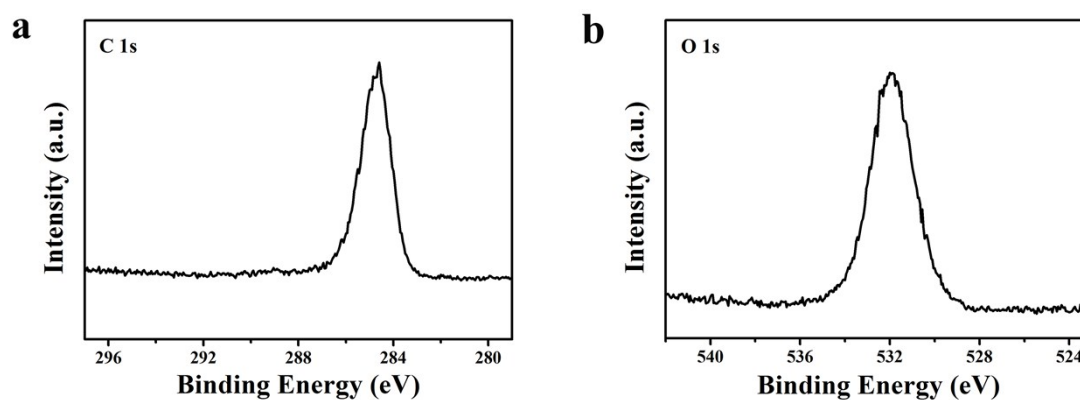

**Fig. S5** XPS spectra of the as-prepared Fe<sub>0.32</sub>Co<sub>0.68</sub>/γ-Al<sub>2</sub>O<sub>3</sub>@C: (a) C 1s, (b) O 1s.

**Table S1** Adsorption parameters got from the two kinetic models for the adsorption of Orange II on Fe<sub>0.32</sub>Co<sub>0.68</sub>/γ-Al<sub>2</sub>O<sub>3</sub>@C

| Kinetic models      | q <sub>e</sub> (mg g <sup>-1</sup> ) | k                                              | R <sup>2</sup> |
|---------------------|--------------------------------------|------------------------------------------------|----------------|
| Pseudo-first-order  | 37.26                                | 0.1914 (min <sup>-1</sup> )                    | 0.4997         |
| Pseudo-second-order | 970.87                               | 0.0853 (g mg <sup>-1</sup> min <sup>-1</sup> ) | 1              |

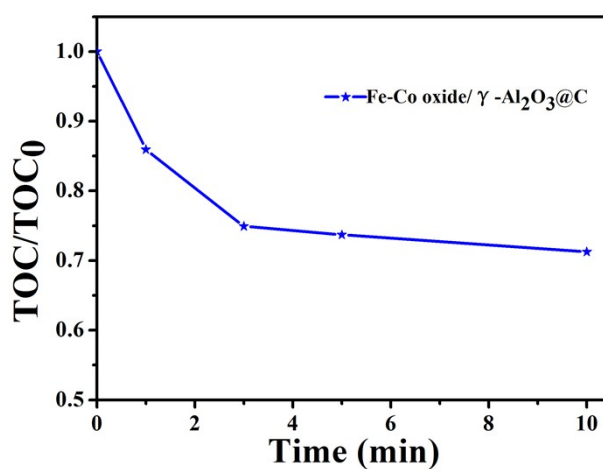

**Fig. S6** Mineralization of Orange II (90 mg L<sup>-1</sup>) by the “Fe-Co oxide/γ-Al<sub>2</sub>O<sub>3</sub>@C +

PMS” system. (Degradation reaction conditions: [PMS] = 1.5 g L<sup>-1</sup>, [catalyst] = 0.05 g L<sup>-1</sup>, pH = 7.0 and T = 20 °C.)

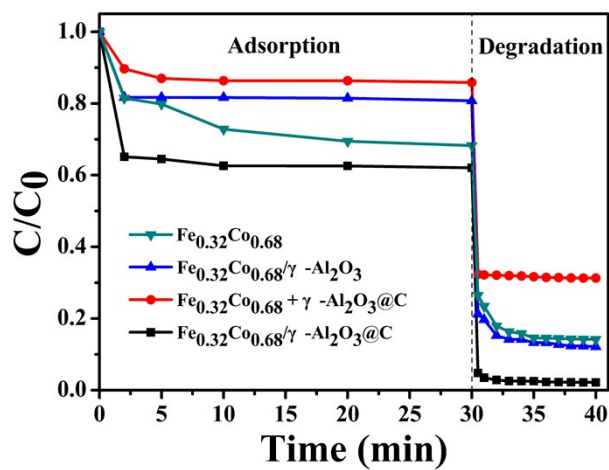

**Fig. S7** Removal efficiency of Orange II (200 mg L<sup>-1</sup>) by different systems combining the adsorption and catalytic degradation.
